# Supplementary material for: Porous 2D coordination polymeric formate built up by Mn(ii) linking of Fe3O units: influence of guest molecules on magnetic properties
Source: Royal Society of Chemistry journal article supplement (doi:10.1039/b900359b), 2009-01-01

Supporting information for the paper

## Porous 2D coordination polymeric formate built up by Mn(II) linking of Fe<sub>3</sub>O units: influence of guest molecules on magnetic properties

Anton S. Lytvynenko, Sergey V. Kolotilov, Olivier Cador, Konstantin S. Gavrilenko, Stéphane Golhen, Lahcène Ouahab and Vitaly V. Pavlishchuk

Figure S1. TGA of sample 1.

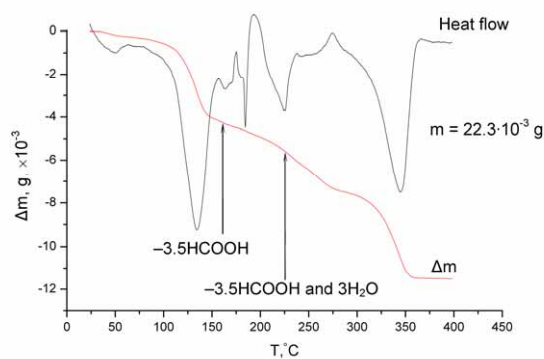

Figure S2. Powder XRD of **2**, **2** with formic acid and calculated XRD for **1** (all for CuK $\alpha$  radiation)

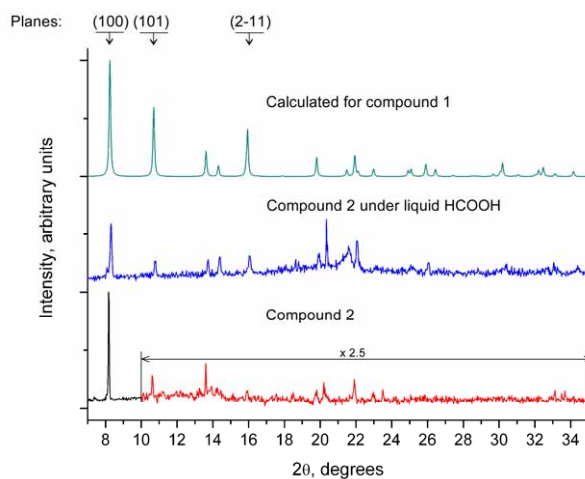

Supplement: b900359b.pdf [file b900359b.pdf]
